# Supplementary material for: Transcatheter Aortic Valve Replacement in Patients with Aortic Stenosis Having Coronary Cusp Fusion versus Mixed Cusp Fusion Nonraphe Bicuspid Aortic Valve
Source: Hindawi journal article supplement (doi:10.1155/2019/7348964), 2019-11-03
Supplement: f1 [file 7348964.f1.pdf]

## Supplementary Materials

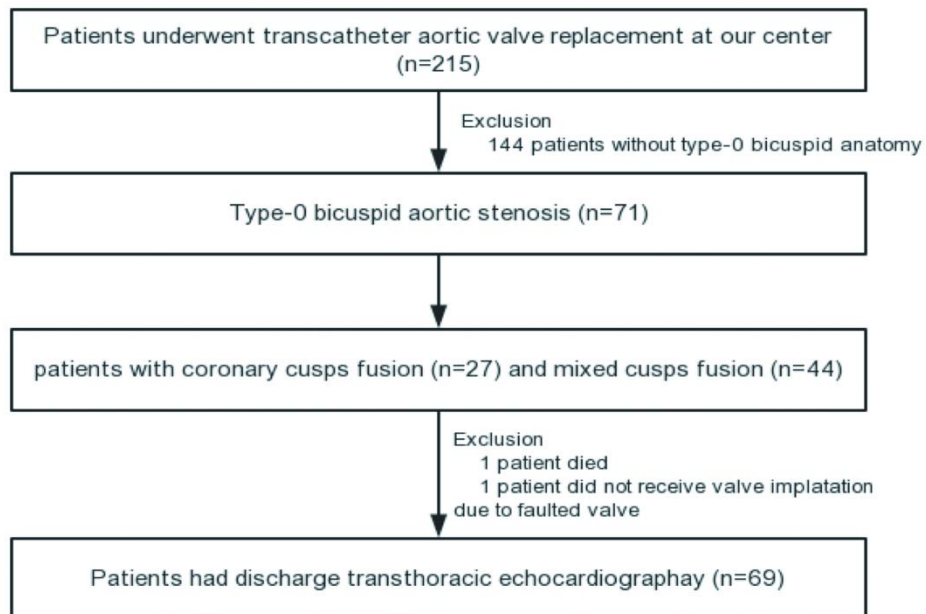

### Supplementary Information Figure S1. Study flow chart

Among the 215 patients who underwent transcatheter aortic valve replacement at our center, 71 had type-0 bicuspid aortic stenosis. Of these, 27 and 44 patients had coronary and mixed cusp fusion, respectively.

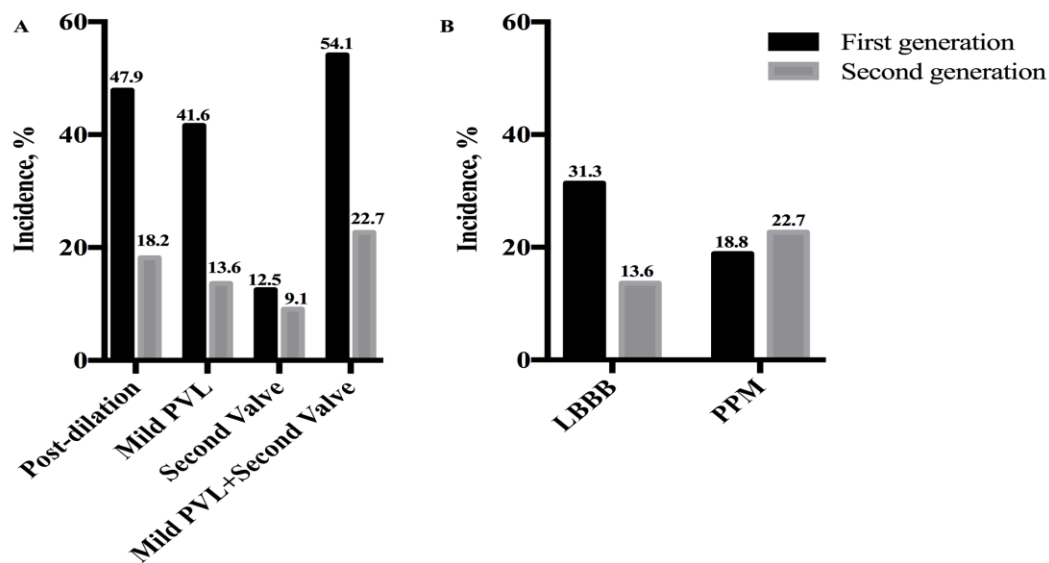

**Supplementary Information Figure S2. Procedural and clinical results of transcatheter aortic valve replacement for type-0 bicuspid aortic stenosis**

Data are shown for first-generation (Medtronic CoreValve/Venus-A) and second-generation valves (Lotus, VitaFlow). Procedural results (A) include the rates of post-dilation and mild PVL, second valve implantation, or both. Clinical results (B) include the rates LBBB, and PPM. LBBB, left bundle branch block; PPM, permanent pacemaker implantation; PVL, paravalvular leakage.

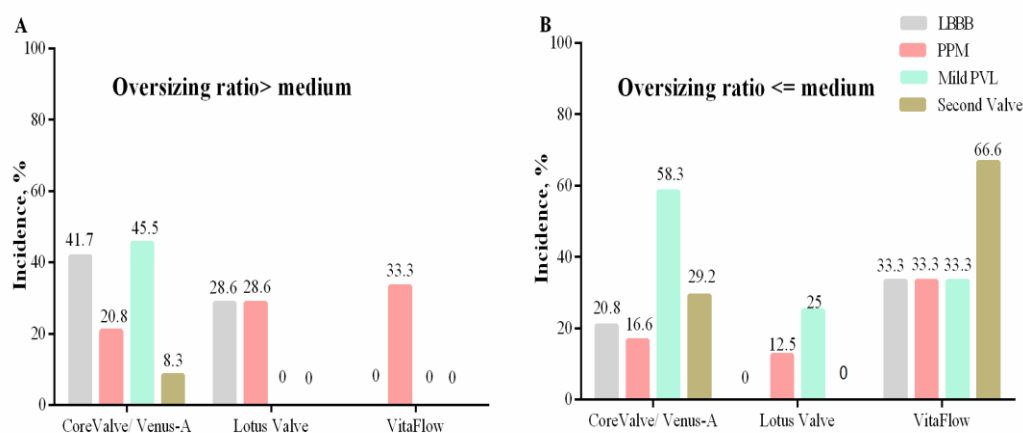

**Supplementary Information Figure S3. Impact of oversizing ratio on the**

### **outcomes of transcatheter aortic valve replacement**

Outcome data were dichotomized for oversizing ratio above (A) or below (B) the median value, which was 13.2% for CoreValve/Venus-A valves, 12.8% for Lotus valves, and 1.9% for VitaFlow valves. LBBB, left bundle branch block; PPM, permanent pacemaker implantation; PVL, paravalvular leakage.

**Supplemental Table 1** Baseline imaging characteristics on multi-slice computed tomography

| Characteristic                    | Total (N=71) | Mixed fusion (N=44) | Coronary fusion (N=27) | P-value      |
|-----------------------------------|--------------|---------------------|------------------------|--------------|
| Annulus                           |              |                     |                        |              |
| Short diameter, mm                | 21.2±2.9     | 21.3±2.8            | 21.1±3.2               | 0.81         |
| Long diameter, mm                 | 26.0±3.3     | 25.4±3.1            | 27.1±3.3               | <b>0.027</b> |
| Ellipticity index, % <sup>*</sup> | 18.0±9.6     | 15.6±9.3            | 21.9±9.0               | <b>0.007</b> |
| Ellipticity index ≥20%            | 32 (45.1%)   | 17 (38.6%)          | 15 (55.6%)             | 0.22         |
| Perimeter, mm                     | 75.4±8.9     | 74.2±8.3            | 77.3±9.7               | 0.16         |
| Area, mm <sup>2</sup>             | 438.2±105.7  | 427.2±99.2          | 456.2±115.3            | 0.27         |
| LVOT                              |              |                     |                        |              |
| Short diameter, mm                | 20.3±4.0     | 20.6±3.6            | 19.8±4.7               | 0.40         |
| Long diameter, mm                 | 28.3±4.0     | 28.2±3.9            | 28.5±4.4               | 0.78         |
| Ellipticity index, % <sup>*</sup> | 28.5±8.5     | 26.9±7.5            | 31.1±9.4               | <b>0.04</b>  |

|                               |                   |                   |                   |      |
|-------------------------------|-------------------|-------------------|-------------------|------|
| Ellipticity index $\geq 20\%$ | 59 (83.1%)        | 35 (79.5%)        | 24 (88.9%)        | 0.35 |
| Perimeter, mm                 | 80.5 $\pm$ 11.3   | 80.1 $\pm$ 11.1   | 81.1 $\pm$ 11.9   | 0.71 |
| Area, mm <sup>2</sup>         | 470.0 $\pm$ 153.2 | 477.5 $\pm$ 138.4 | 457.7 $\pm$ 176.7 | 0.60 |
| <hr/>                         |                   |                   |                   |      |
| Sinus of Valsava              |                   |                   |                   |      |
| Short diameter, mm            | 26.7 $\pm$ 3.2    | 37.3 $\pm$ 4.2    | 36.7 $\pm$ 4.2    | 0.59 |
| Long diameter, mm             | 37.1 $\pm$ 4.2    | 26.3 $\pm$ 3.3    | 27.3 $\pm$ 2.9    | 0.20 |
| Perimeter, mm                 | 106.9 $\pm$ 12.7  | 106.1 $\pm$ 12.6  | 108.1 $\pm$ 13.1  | 0.53 |
| Area, mm <sup>2</sup>         | 873.8 $\pm$ 213.7 | 860.8 $\pm$ 210.9 | 895.2 $\pm$ 220.5 | 0.51 |
| Intercommissural distance, mm | 24.7 $\pm$ 2.6    | 24.3 $\pm$ 2.5    | 25.3 $\pm$ 2.6    | 0.12 |
| <hr/>                         |                   |                   |                   |      |

**Supplemental Table 2** Baseline echocardiographic characteristics

| Characteristics           | Total (N=71) | Mixed fusion | Coronary fusion | P-value |
|---------------------------|--------------|--------------|-----------------|---------|
|                           |              | (N=44)       | (N=27)          |         |
| $V_{\max}$ , m/s          | 5.3±0.7      | 5.3±0.7      | 5.2±0.8         | 0.34    |
| $PG_{\text{mean}}$ , mmHg | 69.6±20.2    | 71.0±19.5    | 67.3±21.5       | 0.47    |
| LVEF, %                   | 53.3±16.2    | 55.0±16.4    | 50.5±15.8       | 0.26    |
| Aortic regurgitation      |              |              |                 | 0.77    |
| None/trace                | 48 (67.6%)   | 31 (70.5%)   | 17 (63.0%)      | 0.60    |
| Mild                      | 18 (15.4%)   | 9 (20.5%)    | 9 (33.3%)       | 0.27    |
| Moderate-to-severe        | 5 (7.0%)     | 4 (9.1%)     | 1 (3.7%)        | 0.64    |
| Mitral regurgitation      |              |              |                 | 0.67    |
| None/trace                | 33 (46.5%)   | 21 (47.7%)   | 12 (44.4%)      | 0.81    |
| Mild                      | 28 (39.4%)   | 18 (40.9%)   | 10 (37.0%)      | 0.47    |

|                         |            |            |            |      |
|-------------------------|------------|------------|------------|------|
| Moderate-to-severe      | 10 (14.1%) | 5 (11.4%)  | 5 (18.5%)  | 0.49 |
| Tricuspid regurgitation |            |            |            | 0.62 |
| None/trace              | 46 (64.8%) | 30 (68.2%) | 16 (59.3%) | 0.61 |
| Mild                    | 22 (31.0%) | 13 (29.5%) | 9 (33.3%)  | 0.80 |
| Moderate-to-severe      | 3 (4.2%)   | 1 (2.3%)   | 2 (7.4%)   | 0.55 |

---

The patients were stratified according to the type of cusp fusion. Data are shown as mean  $\pm$  standard deviation or frequency (percentage). LVEF, left ventricular ejection fraction; PG<sub>mean</sub>, mean paravalvular gradient; V<sub>max</sub>, maximum velocity of the aortic jet.
